# Supplementary material for: β-Hydroxybutyrate Oxidation Promotes the Accumulation of Immunometabolites in Activated Microglia Cells
Source: MDPI journal article supplement (doi:10.3390/metabo10090346), 2020-08-26
Supplement: s1 [file s1]

## $\beta$ -hydroxybutyrate oxidation promotes the accumulation of immunometabolites in activated microglia cells

### Supplementary Results

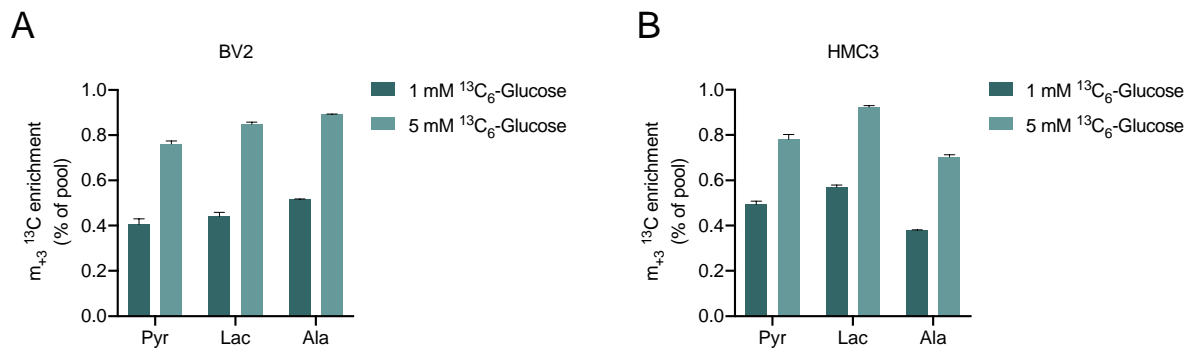

**Figure S1. Glycolytic flux in cells cultured in 1 and 5 mM glucose conditions.**

$^{13}\text{C}$  enrichment of glycolytic metabolites (Pyr, pyruvate; Lac, lactate; Ala, alanine) in BV2 (A) and HMC3 (B) cells cultured in 1 or 5 mM  $^{13}\text{C}_6$ -glucose for 24h. Bars represent mean  $\pm$  SD of n=3 biological replicates.

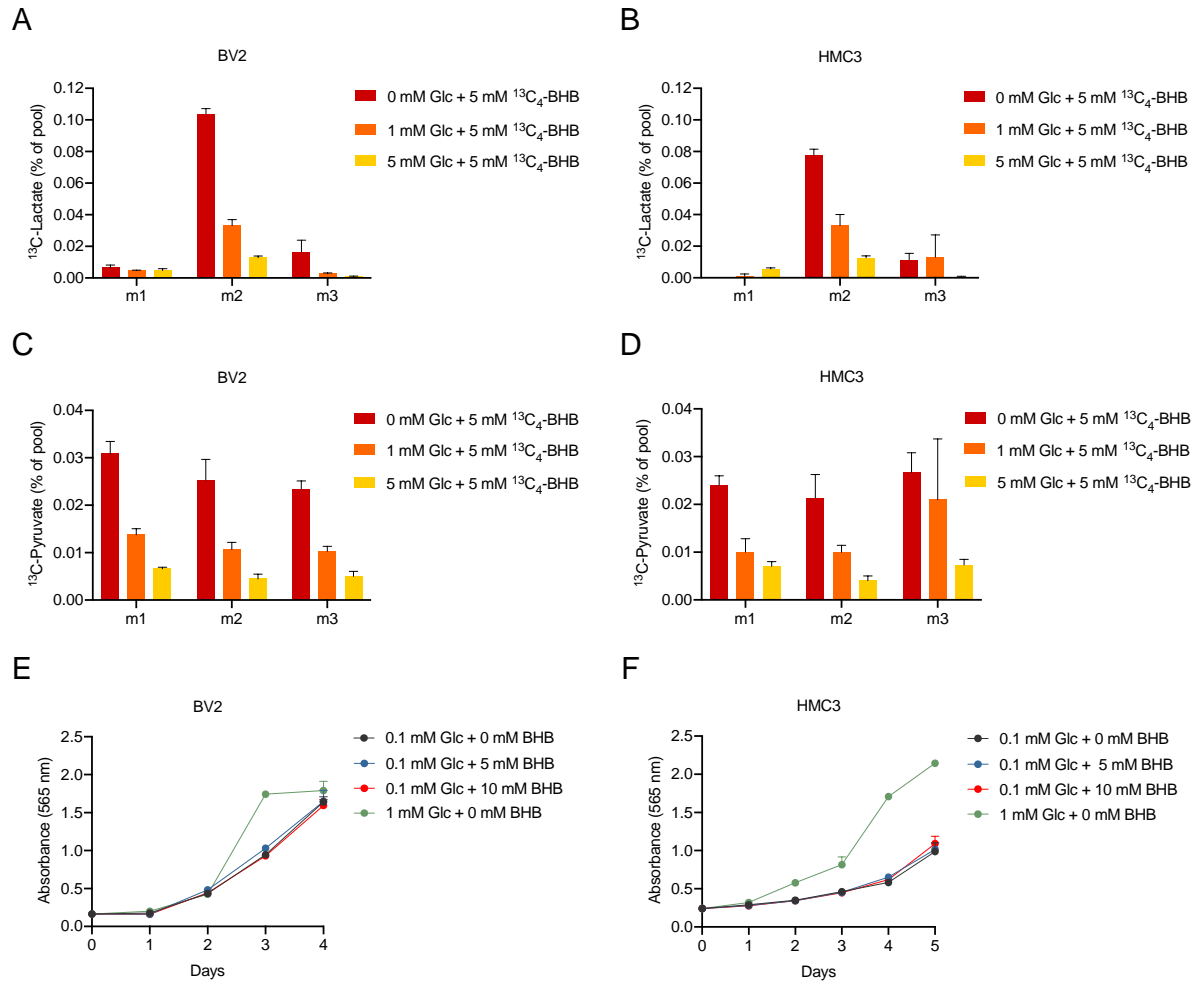

**Figure S2. BHB-derived pyruvate and lactate and effects of BHB on proliferation in very low glucose conditions.**

(A-D)  $^{13}\text{C}$  enrichment of intracellular lactate and pyruvate in BV2 and HMC3 cells cultured with 5 mM  $^{13}\text{C}_4$ -BHB under conditions containing no glucose added, 1 mM or 5 mM unlabelled glucose for 24h. In all cases bars represent mean  $\pm$  SD of n=3 biological replicates (with exception of HMC3 1 mM glucose where n=2).

(E-F) Proliferation of BV2 (E) and HMC3 (F) cells in 0.1 mM glucose supplemented with 5 or 10 mM BHB in media containing 10% dialysed FBS. Proliferation in 1 mM glucose is shown as a control. Each data point represent mean  $\pm$  SD of n=3 biological replicates.

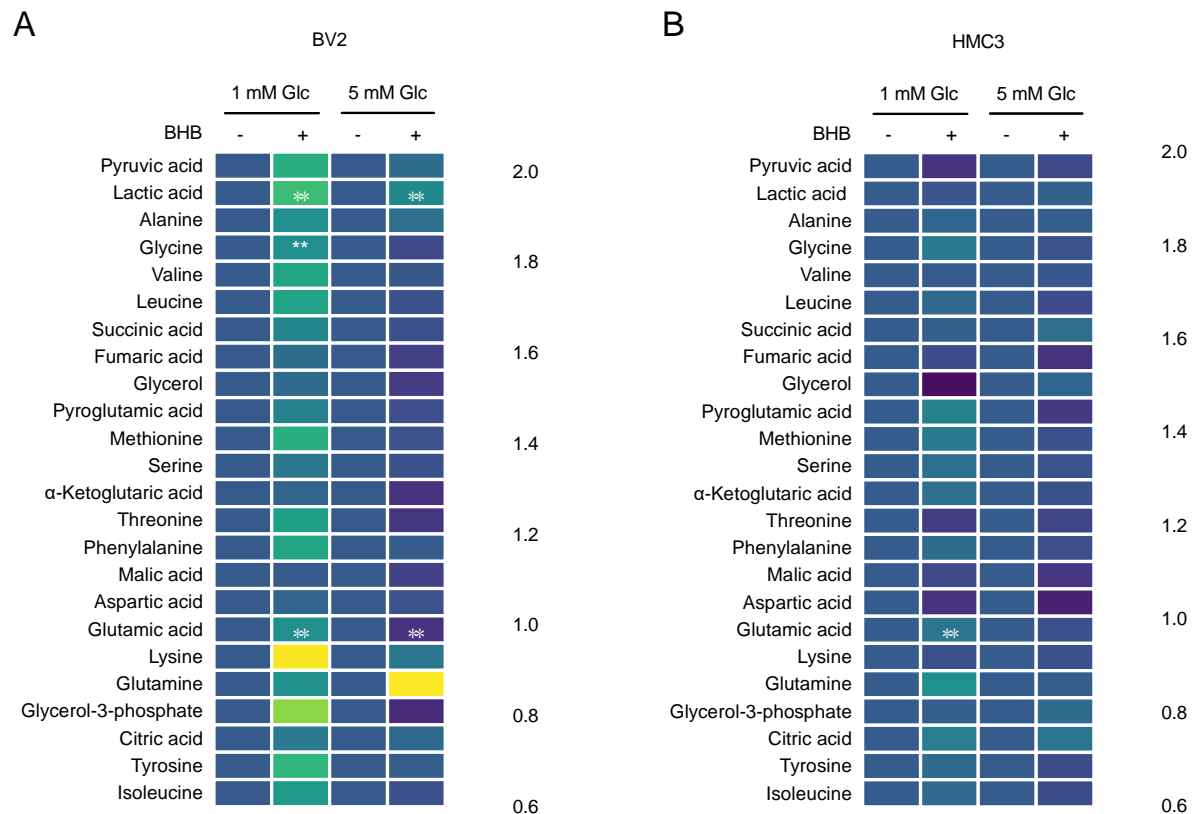

**Figure S3. Metabolic profiling of BV2 and HMC3 cells treated with BHB in 1 and 5 mM glucose.**

Metabolite levels in BV2 (A) and HMC3 (B) cells supplemented with 5 mM BHB in 1 mM and 5 mM glucose for 24h. Metabolite levels were normalised by untreated control for each glucose condition and expressed as fold-change as per colour-coded scale. Each data point represents mean of n=2-3 (-BHB) and n=5-6 (+BHB) biological replicates. Statistical differences were assessed by unpaired t-test for each metabolite (-BHB vs. +BHB within glucose class) followed by Hold-Sidak correction for multiple comparisons.

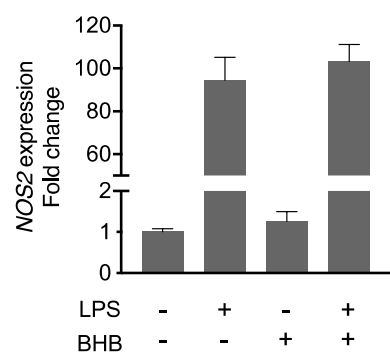

**Figure S4. *NOS2* expression in BV2 cells treated with LPS and BHB.**

Expression of *NOS2* in BV2 cells treated with 100 ng/mL LPS and/or 5 mM BHB for 6h.

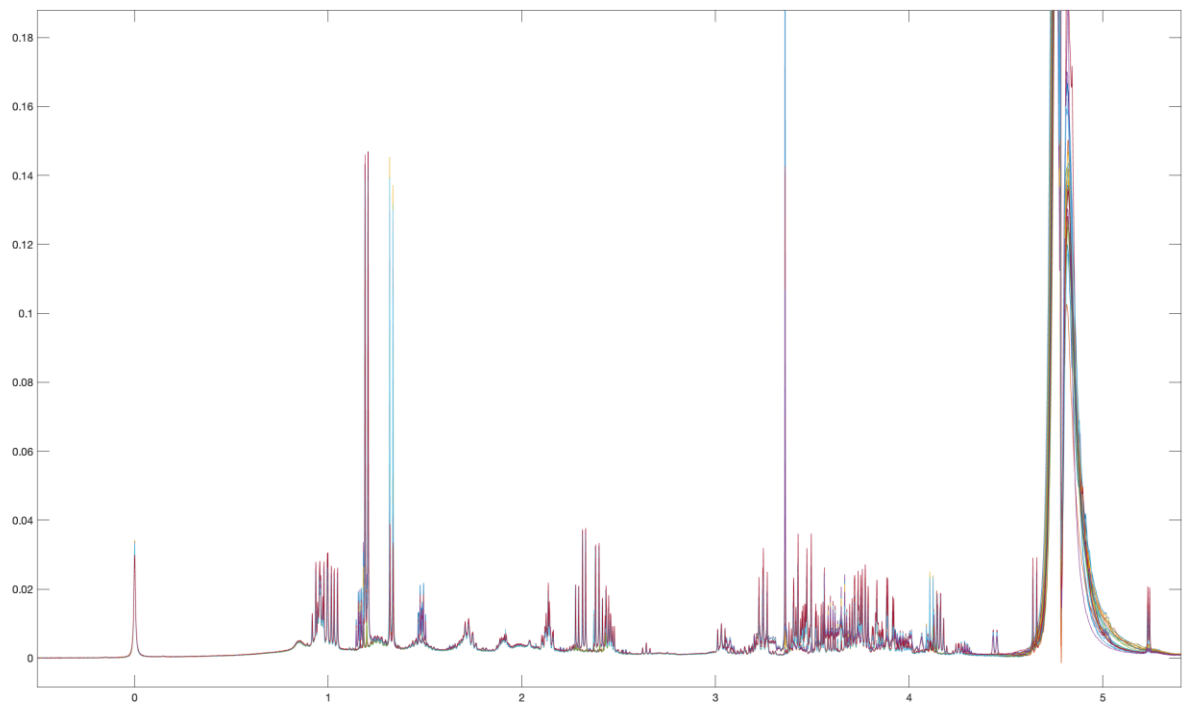

**Figure S5. Representative NMR spectra**

NMR spectra of media samples collected at the beginning and at the end of a  $^{13}\text{C}_6$ -glucose labelling experiment where cells were treated with BHB (5 mM) and/or LPS (100 ng/mL). Samples from cultures obtained in the same conditions using  $^{12}\text{C}_6$ -glucose are also included.
