# Supplementary material for: β-Hydroxybutyrate Oxidation Promotes the Accumulation of Immunometabolites in Activated Microglia Cells
Source: MDPI journal article supplement (doi:10.3390/metabo10090346), 2020-08-26
Supplement: s1 [file s1]

## **β-hydroxybutyrate oxidation promotes the accumulation of immunometabolites in activated microglia cells**

### **Supplementary Methods**

| <b>Metabolite</b>          | <b>RT</b> | <b>m/z range</b> | <b>Formula</b>                                               |
|----------------------------|-----------|------------------|--------------------------------------------------------------|
| Pyruvic acid               | 10.39     | 174-177          | C <sub>3</sub> H <sub>4</sub> O <sub>3</sub>                 |
| Lactic acid                | 13.30     | 261-264          | C <sub>3</sub> H <sub>6</sub> O <sub>3</sub>                 |
| Alanine                    | 13.88     | 260-263          | C <sub>3</sub> H <sub>7</sub> NO <sub>2</sub>                |
| Glycine                    | 14.20     | 246-248          | C <sub>2</sub> H <sub>5</sub> NO <sub>2</sub>                |
| Valine                     | 15.24     | 288-293          | C <sub>5</sub> H <sub>11</sub> NO <sub>2</sub>               |
| Leucine                    | 16.09     | 302-308          | C <sub>6</sub> H <sub>13</sub> NO <sub>2</sub>               |
| Isoleucine                 | 16.10     | 302-308          | C <sub>6</sub> H <sub>13</sub> NO <sub>2</sub>               |
| Succinic acid              | 16.49     | 289-293          | C <sub>4</sub> H <sub>6</sub> O <sub>4</sub>                 |
| Fumaric acid               | 16.84     | 287-291          | C <sub>4</sub> H <sub>4</sub> O <sub>4</sub>                 |
| Glycerol                   | 17.60     | 377-380          | C <sub>3</sub> H <sub>8</sub> O <sub>3</sub>                 |
| Pyroglutamic acid          | 18.42     | 300-305          | C <sub>5</sub> H <sub>7</sub> NO <sub>3</sub>                |
| Methionine                 | 18.56     | 320-325          | C <sub>5</sub> H <sub>11</sub> NO <sub>2</sub> S             |
| Serine                     | 18.71     | 390-393          | C <sub>3</sub> H <sub>7</sub> NO <sub>3</sub>                |
| α-Ketoglutaric acid        | 18.92     | 346-351          | C <sub>5</sub> H <sub>6</sub> O <sub>5</sub>                 |
| Threonine                  | 19.00     | 404-408          | C <sub>4</sub> H <sub>9</sub> NO <sub>3</sub>                |
| Phenylalanine              | 19.73     | 336-345          | C <sub>9</sub> H <sub>11</sub> NO <sub>2</sub>               |
| Malic acid                 | 19.88     | 419-423          | C <sub>4</sub> H <sub>6</sub> O <sub>5</sub>                 |
| Aspartic acid              | 20.28     | 418-422          | C <sub>4</sub> H <sub>7</sub> NO <sub>4</sub>                |
| Glutamic acid              | 21.34     | 432-437          | C <sub>5</sub> H <sub>9</sub> NO <sub>4</sub>                |
| Dihydroxyacetone phosphate | 22.05     | 484-487          | C <sub>3</sub> H <sub>7</sub> O <sub>6</sub> P               |
| Lysine                     | 22.29     | 431-437          | C <sub>6</sub> H <sub>14</sub> N <sub>2</sub> O <sub>2</sub> |
| Glutamine                  | 22.65     | 431-436          | C <sub>5</sub> H <sub>10</sub> N <sub>2</sub> O <sub>3</sub> |
| Glycerol-3-phosphate       | 23.38     | 571-574          | C <sub>3</sub> H <sub>9</sub> O <sub>6</sub> P               |
| Citric acid                | 24.05     | 591-597          | C <sub>6</sub> H <sub>8</sub> O <sub>7</sub>                 |
| Tyrosine                   | 24.33     | 466-475          | C <sub>9</sub> H <sub>11</sub> NO <sub>3</sub>               |

Table of metabolites detected by GC-MS. Retention times (RT) may vary depending on chromatographic conditions.
